# Supplementary material for: Noncoding RNA (ncRNA) Profile Association with Patient Outcome in Epithelial Ovarian Cancer Cases
Source: PubMed Central journal article supplement (PMC7862201; doi:10.1007/s43032-020-00372-7), 2020-10-30
Supplement: 43032_2020_372_MOESM4_ESM.pdf [file 43032_2020_372_MOESM4_ESM.pdf]

# S4 Figure

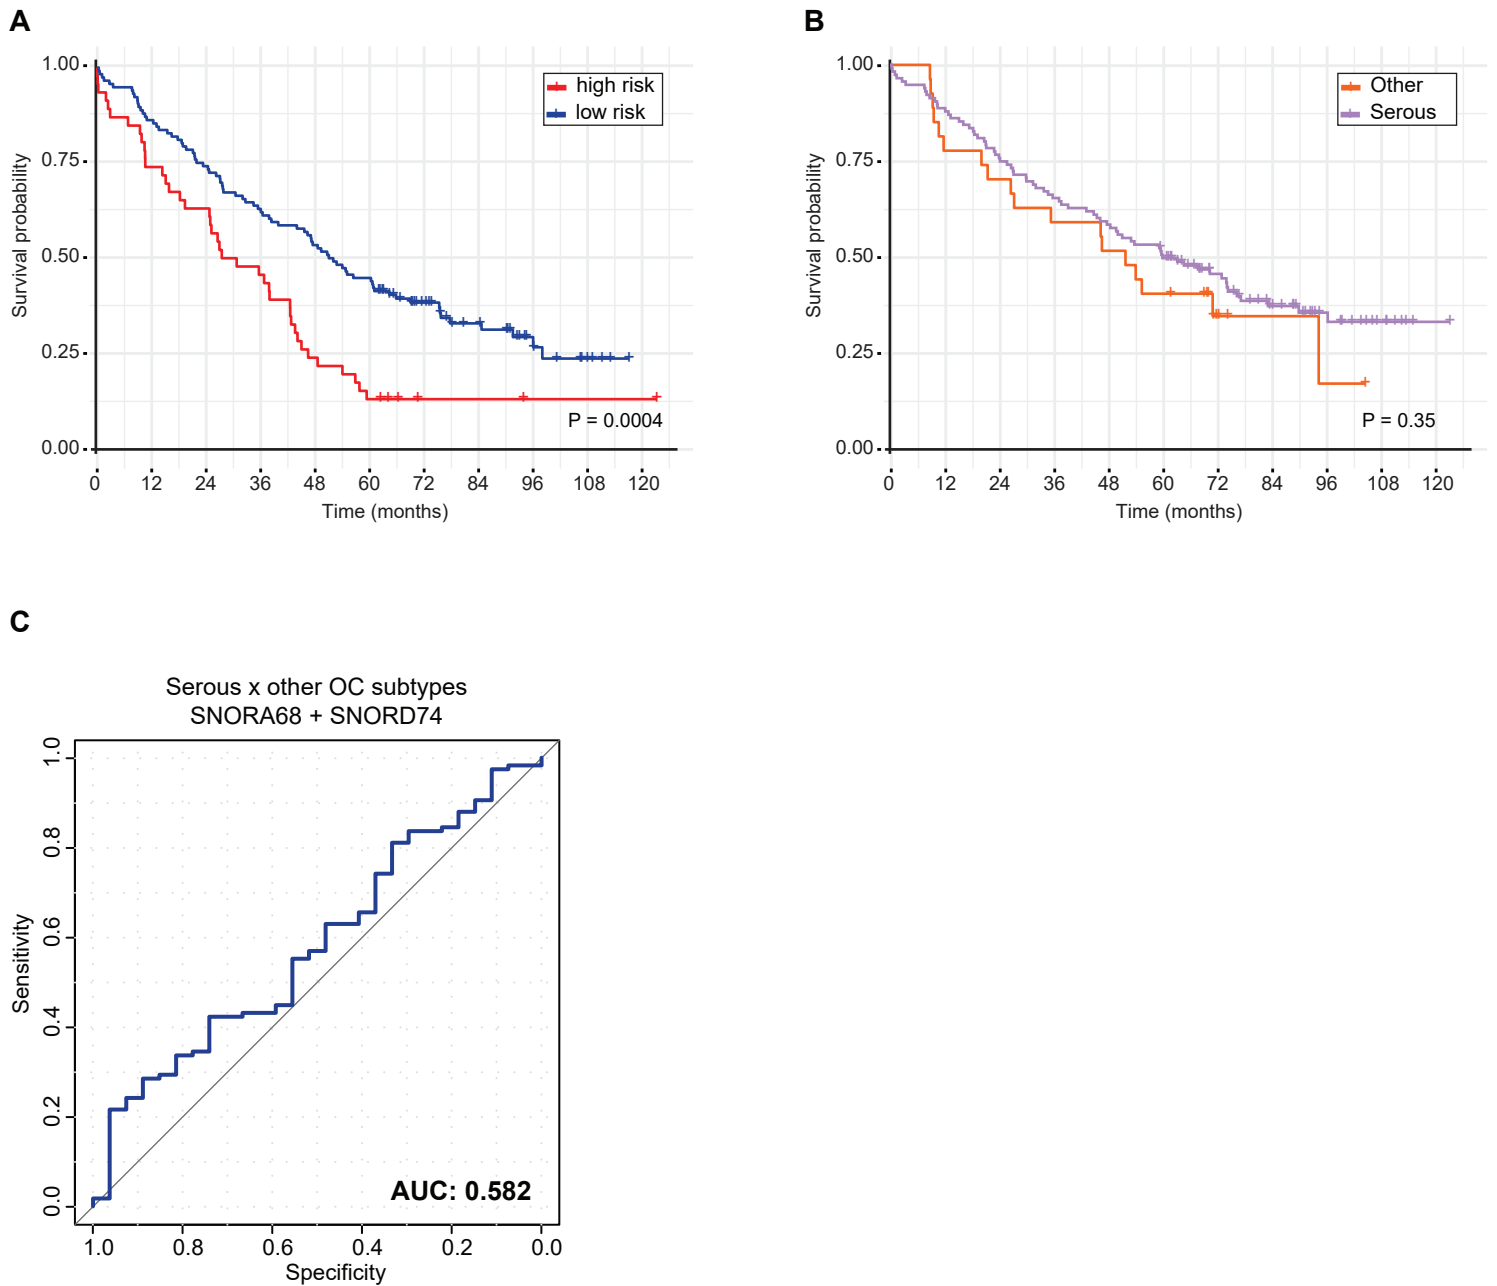

**S4 Figure.** (A) Survival curve between “high risk” (red) and “low risk” (blue) in serous adenocarcinoma subtype. (B) Survival curve between serous adenocarcinoma and other OC subtypes. (C) AUC/ROC curve of combination of SNORA68 and SNORD74 in serous adenocarcinoma x other OC subtypes. P-values and AUC are presented above.
