# Supplementary material for: Noncoding RNA (ncRNA) Profile Association with Patient Outcome in Epithelial Ovarian Cancer Cases
Source: PubMed Central journal article supplement (PMC7862201; doi:10.1007/s43032-020-00372-7), 2020-10-30
Supplement: 43032_2020_372_MOESM5_ESM.pdf [file 43032_2020_372_MOESM5_ESM.pdf]

**S5 Figure**

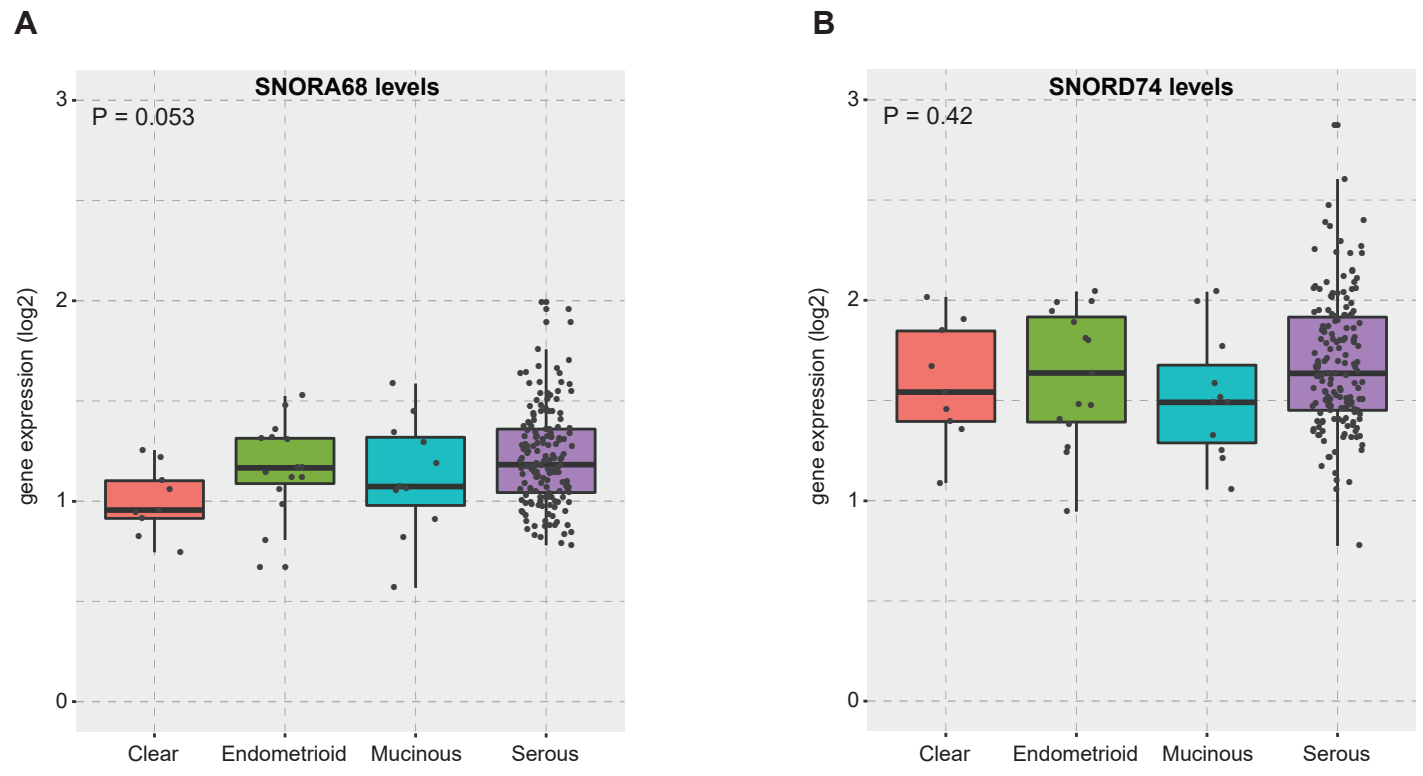

**S5 Figure.** Gene expression in all OC subtypes for SNORA68 (A), and SNORD74 (B). Values are normalized and provided as log<sub>2</sub> and P-values are presented above.
