# Supplementary material for: Noncoding RNA (ncRNA) Profile Association with Patient Outcome in Epithelial Ovarian Cancer Cases
Source: PubMed Central journal article supplement (PMC7862201; doi:10.1007/s43032-020-00372-7), 2020-10-30
Supplement: 43032_2020_372_MOESM6_ESM.pdf [file 43032_2020_372_MOESM6_ESM.pdf]

## S6 Figure

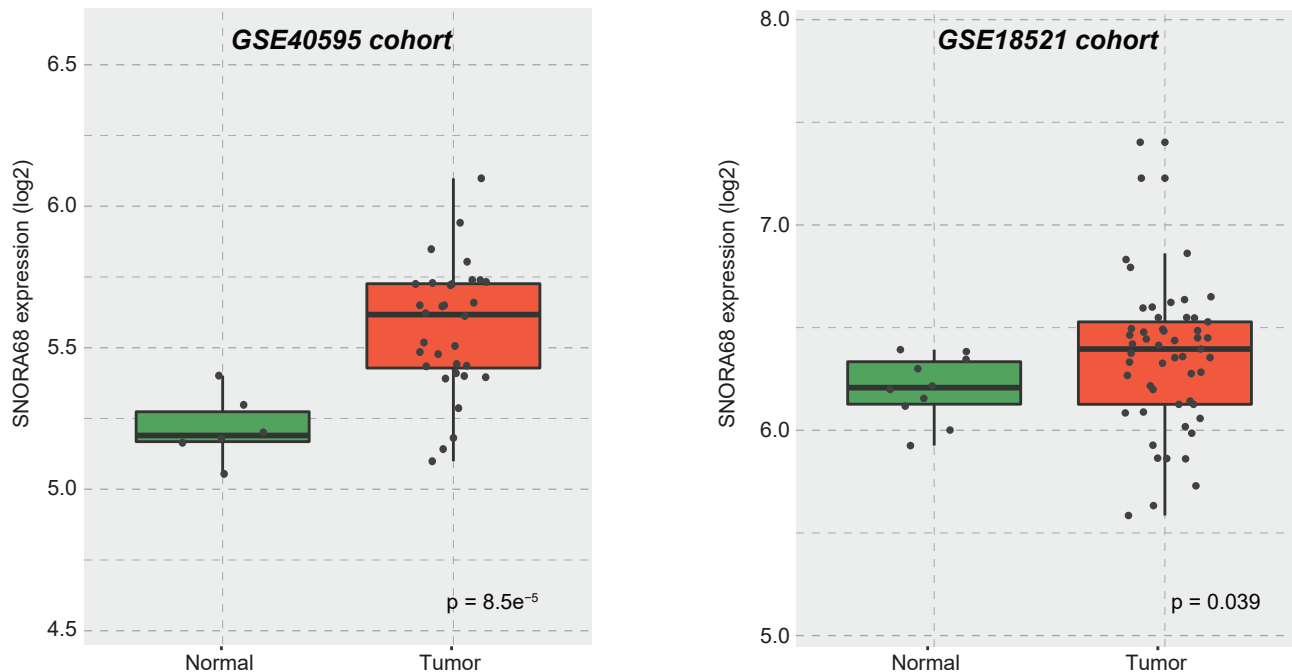

**S6 Figure.** SNORA68 expression in normal x OC samples. Expression values for SNORA68 in normal (green) and tumor (red) tissues in 2 independent cohorts, GSE40595 and GSE18521. Values are normalized and provided as  $\log_2$  and P-value is presented above.
